# Supplementary material for: Therapeutic Response-Based Reclassification of Multiple Tumor Subtypes Reveals Intrinsic Molecular Concordance of Therapy Across Histologically Disparate Cancers
Source: Front Cell Dev Biol. 2021 Nov 12;9:773101. doi: 10.3389/fcell.2021.773101 (PMC8632957; doi:10.3389/fcell.2021.773101)
Supplement: Supplementary file 11 [file Table1.XLSX]

## Sheet: table.s1
Supplementary Table 1. Genes mapped in core cancer pathways annotated by KEGG (Kyoto Encyclopedia of Genes and Genomes), MIPS (The Munich Information Center for Protein Sequences), BIOCARTA, PID (Pathway Interaction Database), and REACTOME databases.
BIOCARTA_MAPK_PATHWAY	MAPK3,MAP3K3,HRAS,MAPK11,NFKBIA,MAP4K1,RPS6KA4,MAP2K5,MAPK10,MAP4K5,TGFB2,MAPK8,MAP2K1,MAP3K2,RPS6KA1,MAPK7,RAF1,MAPK13,ELK1,MAP3K5,MAP3K6,CHUK,MYC,MAPKAPK3,MAX,DAXX,MKNK1,MAP3K4,MAP3K14,MAPK6,RAC1,MAPKAPK5,MAP4K4,MAPK1,MAP3K8,MAPK12,MAPK4,SHC1,PAK1,GRB2,RPS6KA3,MAP3K9,TRADD,RPS6KB1,MAP2K6,MAP2K2,MAP3K10,MAPK9,MAPK14,TGFBR1,MAP3K11,RELA,RPS6KA5,MAP2K3,MAP2K4,MKNK2,CREB1,PAK2,RIPK1,TRAF2,MAP2K7,MA…
BIOCARTA_P53_PATHWAY	CDK2,GADD45A,CDK4,PCNA,BCL2,CCNE1,ATM,CDKN1A,RB1,TP53,MDM2,CCND1,APAF1,BAX,TIMP3,E2F1
BIOCARTA_P53HYPOXIA_PATHWAY	NFKBIB,HIC1,GADD45A,MAPK8,TAF1,HSPA1A,ATM,CDKN1A,NQO1,TP53,FHL2,IGFBP3,RPA1,MDM2,ABCB1,DNAJB1,EP300,HSP90AA1,AKT1,HIF1A,BAX
BIOCARTA_PTEN_PATHWAY	MAPK3,FASLG,PIK3R1,FOXO3,CDKN1B,PDK2,MAPK1,SHC1,GRB2,PDPK1,BCAR1,EGFR,PTEN,AKT1,PIK3CA,ITGB1,ILK,SOS1
BIOCARTA_RAS_PATHWAY	MAPK3,RALA,PIK3CG,HRAS,RALGDS,PIK3R1,MAP2K1,RAF1,ELK1,CHUK,RHOA,CASP9,BAD,PLD1,RAC1,CDC42,RELA,AKT1,RALBP1,PIK3CA,FOXO4,NFKB1
BIOCARTA_TGFB_PATHWAY	MAPK3,SMAD2,SMAD4,TGFBR2,TGFB2,MAP2K1,APC,CREBBP,CDH1,SMAD7,TGFBR1,TAB1,EP300,ZFYVE9,SKIL,TGFB3,MAP3K7,TGFB1,SMAD3
BIOCARTA_WNT_PATHWAY	SMAD4,HDAC1,FZD1,PPP2CA,FRAT1,APC,TLE1,MYC,CTBP1,NLK,WNT1,WIF1,GSK3B,CREBBP,CTNNB1,TAB1,CCND1,AXIN1,MAP3K7,BTRC,CSNK2A1,HNF1A,PPARD,DVL1
KEGG_AMINOACYL_TRNA_BIOSYNTHESIS	CARS2,DARS2,RARS1,SARS1,VARS2,YARS2,WARS1,AARS1,FARSA,HARS1,SARS2,RARS2,NARS1,LARS2,FARSB,AARS2,YARS1,NARS2,GARS1,IARS2,KARS1,WARS2,TARS3,LARS1,VARS1,PARS2,MARS2,CARS1,IARS1,TARS2,SEPSECS,MTFMT,TARS1,DARS1,HARS2,PSTK,QARS1,EARS2,EPRS1,FARS2,MARS1
KEGG_APOPTOSIS	CASP10,CASP9,CASP8,CASP7,CHUK,PRKAR2B,TNF,TNFSF10,BIRC3,XIAP,PPP3R2,PPP3CC,PPP3R1,MYD88,FADD,CFLAR,RIPK1,BAD,IRAK4,BID,BAX,IKBKB,CASP6,IL1A,AKT1,CASP3,AKT2,TNFRSF1A,AKT3,CHP2,ATM,ENDOG,NFKB1,NFKBIA,CAPN2,PIK3R5,IKBKG,CAPN1,IL3RA,IL3,RELA,ENDOD1,APAF1,PRKX,CSF2RB,TNFRSF10A,TRAF2,TNFRSF10D,NGF,TNFRSF10B,TNFRSF10C,MAP3K14,IL1RAP,IL1B,IRAK2,IL1R1,IRAK1,TRADD,PIK3R3,BCL2,BCL2L1,BIRC2,IRAK3,PRKACA,PRKA…
KEGG_MAPK_SIGNALING_PATHWAY	JUN,MEF2C,ELK4,ELK1,JUND,GADD45B,MAP3K20,STMN1,RRAS2,MAP3K5,MAP3K1,MAP3K3,MAP3K4,MAP3K7,MAP3K8,AKT1,AKT2,ARRB2,CD14,ARRB1,NRAS,DUSP16,CHP2,RASGRP3,NFKB2,NFKB1,MYC,NFATC4,MAPK14,FLNC,FLNA,KRAS,FLNB,PRKX,TRAF6,TGFB2,DUSP1,DUSP2,TGFB1,TRAF2,BDNF,TAB2,ECSIT,TGFBR2,DUSP7,TGFBR1,DUSP5,DUSP6,DUSP3,TGFB3,PLA2G4E,DUSP4,CACNG5,CACNG4,NF1,PLA2G12A,NFATC2,RASGRP4,MAP3K2,MAX,DUSP10,FGF9,FGF8,FGF7,FGF6,FGF5,FG…
KEGG_CELL_CYCLE	CDC16,CDC7,CDC45,GADD45B,DBF4,ANAPC1,CREBBP,MDM2,ABL1,SMC1B,SKP1P2,GADD45G,ATM,ATR,ANAPC7,RBL2,ANAPC5,RBL1,MYC,CDC14B,SMC1A,CDC14A,SKP1,TGFB2,TGFB1,GADD45A,STAG1,PLK1,RBX1,STAG2,TGFB3,MCM4,ORC6,CCND1,MAD1L1,MCM3,MCM6,MCM5,YWHAB,CCNA2,MCM7,BUB1,CHEK1,WEE2,MCM2,PTTG1,CDC27,CDC25B,CDC25C,CDC25A,CDC6,CDC20,BUB3,YWHAZ,CCND2,YWHAH,CCNB1,YWHAG,YWHAE,CCNE1,ORC3,CCND3,PTTG2,SFN,E2F1,TFDP1,ZBTB17,CDK1,ESPL…
KEGG_P53_SIGNALING_PATHWAY	CASP9,CASP8,SFN,TSC2,IGF1,CDK1,GADD45B,RCHY1,ZMAT3,IGFBP3,RRM2B,ADGRB1,TP73,SERPINB5,RPRM,PPM1D,BID,MDM4,BAX,MDM2,TP53AIP1,CASP3,TP53I3,PMAIP1,PIDD1,COP1,PERP,GADD45G,EI24,SESN2,ATM,ATR,SESN3,CHEK2,APAF1,CDKN2A,RRM2,CDKN1A,BBC3,GADD45A,TNFRSF10B,DDB2,GTSE1,SIAH1,CCND1,CD82,PTEN,CDK2,CHEK1,SESN1,CDK4,SERPINE1,TP53,CCNE2,FAS,CDK6,CYCS,STEAP3,CCNB2,CCND2,SHISA5,CCNB1,CCNG1,CCNE1,CCNB3,THBS1,CCNG2,CC…
KEGG_WNT_SIGNALING_PATHWAY	JUN,LRP5,LRP6,PPP3R2,SFRP2,SFRP1,PPP3CC,VANGL1,PPP3R1,FZD1,FZD4,APC2,FZD6,FZD7,SENP2,FZD8,LEF1,CREBBP,FZD9,PRICKLE1,CTBP2,ROCK1,CTBP1,WNT9B,WNT9A,CTNNBIP1,DAAM2,TBL1XR1,MMP7,CER1,MAP3K7,VANGL2,WNT2B,WNT11,WNT10B,DKK2,SKP1P2,CHP2,AXIN1,AXIN2,DKK4,NFAT5,MYC,SOX17,CSNK2A1,CSNK2A2,NFATC4,CSNK1A1,NFATC3,CSNK1E,BTRC,PRKX,SKP1,FBXW11,RBX1,CSNK2B,SIAH1,TBL1Y,WNT5B,CCND1,CAMK2A,NLK,CAMK2B,CAMK2D,CAMK2G,PR…
KEGG_NOTCH_SIGNALING_PATHWAY	HES5,DTX3,NOTCH4,DTX3L,NOTCH3,NOTCH2,EP300,HES1,NOTCH1,NUMB,PSEN2,PSEN1,PTCRA,SNW1,APH1A,KAT2A,ADAM17,RFNG,RBPJ,DTX1,CREBBP,DTX2,MAML1,CTBP2,NCOR2,CTBP1,DVL3,JAG2,DVL2,NUMBL,MAML2,KAT2B,DLL4,PSENEN,DLL3,DVL1,CIR1,DLL1,LFNG,JAG1,MAML3,HDAC1,HDAC2,NCSTN,DTX4,MFNG,RBPJL
KEGG_HEDGEHOG_SIGNALING_PATHWAY	CSNK1A1L,HHIP,PTCH2,GAS1,WNT3A,ZIC2,WNT9B,WNT9A,LRP2,CSNK1G1,WNT2B,WNT11,WNT10B,IHH,SMO,WNT10A,WNT4,CSNK1G3,SHH,WNT1,CSNK1D,RAB23,CSNK1A1,CSNK1G2,CSNK1E,BMP8A,GSK3B,WNT7A,BTRC,WNT7B,WNT8A,WNT8B,WNT2,WNT3,PRKX,WNT5A,WNT6,FBXW11,STK36,WNT5B,GLI1,DHH,PRKACA,PRKACB,SUFU,BMP4,PRKACG,BMP2,GLI2,BMP7,GLI3,PTCH1,BMP8B,WNT16,BMP5,BMP6
KEGG_TGF_BETA_SIGNALING_PATHWAY	TFDP1,NOG,TNF,GDF7,INHBB,INHBC,COMP,INHBA,THBS4,RHOA,CREBBP,ROCK1,ID1,ID2,RPS6KB1,RPS6KB2,CUL1,SKP1P2,ID4,SMAD3,MAPK3,RBL2,SMAD4,RBL1,NODAL,SMAD1,MYC,SMAD2,MAPK1,SMURF2,SMURF1,EP300,BMP8A,GDF5,SKP1,CHRD,TGFB2,TGFB1,IFNG,CDKN2B,PPP2CB,PPP2CA,PPP2R1A,ID3,SMAD5,RBX1,FST,PITX2,PPP2R1B,TGFBR2,AMHR2,LTBP1,LEFTY1,AMH,TGFBR1,SMAD9,LEFTY2,SMAD7,ROCK2,TGFB3,SMAD6,BMPR2,GDF6,BMPR1A,BMPR1B,ACVRL1,ACVR2B,ACVR…
KEGG_JAK_STAT_SIGNALING_PATHWAY	STAT3,STAT4,STAT1,STAT2,PIAS3,TYK2,IL21R,CREBBP,SOCS5,IL23A,CTF1,STAM,SPRY4,IL22,JAK1,AKT1,AKT2,JAK3,JAK2,AKT3,STAT5B,STAT5A,TPO,STAT6,MYC,IL24,SPRED1,PIK3R5,CSF2,IL13RA2,PIAS1,IL13RA1,CNTF,PRLR,CNTFR,PRL,SOCS1,IFNE,CSF2RB,CSF2RA,IL23R,CSF3,SOCS3,CCND1,IL22RA2,CSH1,BCL2L1,CSF3R,PIAS4,CBLC,CLCF1,OSMR,IL20,CCND2,CCND3,SOS2,EPO,PTPN11,IL9R,MPL,SPRED2,IFNA5,IFNA4,IFNA2,IFNLR1,SOCS2,IFNA1,CISH,PTPN6,I…
PID_NOTCH_PATHWAY	NCOR1,NOTCH1,DTX1,FURIN,SSPOP,DLL1,DNM1,PTCRA,RAB11A,NEURL1,CTBP1,FBXW7,NUMB,CBL,MFAP2,MYCBP,DLL4,MAML1,SPEN,MYC,SKP2,CNTN6,NOTCH2,PSEN1,MAML2,YY1,GATA3,ENO1,ITCH,IL4,APH1B,LNX1,NCOR2,RBPJ,CDKN1A,JAG2,ADAM12,DLK1,EPS15,DNER,SKP1,NOTCH3,RBBP8,NOTCH4,JAG1,APH1A,DLL3,PSENEN,MFAP5,NCSTN,CCND1,EP300,HDAC1,MARK2,MIB1,ADAM10,CUL1,CNTN1,KDM1A
PID_WNT_NONCANONICAL_PATHWAY	YES1,PRKCZ,MAP3K7,TAB2,FLNA,CSNK1A1,CDC42,DAAM1,FZD7,WNT5A,ROR2,NFATC2,SETDB1,NLK,ROCK1,RAC1,ARRB2,FZD5,MAPK8,CHD7,MAPK9,PPARG,CAMK2A,DVL1,RHOA,FZD6,CTHRC1,DVL2,DVL3,FZD2,TAB1,MAPK10
PID_WNT_SIGNALING_PATHWAY	DKK1,WNT3A,FZD9,WNT2,WNT7A,IGFBP4,WNT1,FZD8,FZD1,KREMEN2,LRP6,KREMEN1,FZD2,LRP5,FZD6,RSPO1,WNT7B,FZD4,CTHRC1,WNT5A,RYK,FZD5,ATP6AP2,WNT3,ROR2,WIF1,FZD10,FZD7
PID_WNT_CANONICAL_PATHWAY	LRP6,GSK3A,AXIN1,CUL3,WNT3A,DVL3,GSK3B,FZD5,PPP2R5A,CSNK1G1,DVL1,PI4K2A,CTNNB1,DVL2,APC,NKD2,PIP5K1B,RANBP3,KLHL12,CAV1
REACTOME_INTRINSIC_PATHWAY_FOR_APOPTOSIS	BAD,BID,BAK1,CASP8,TP63,TP73,BAX,PPP1R13B,DYNLL1,MAPK1,GZMB,E2F1,XIAP,MAPK3,BMF,GSDMD,AKT2,BBC3,CARD8,GSDME,MAPK8,SEPTIN4,C1QBP,YWHAE,TFDP2,AKT3,APAF1,PPP3CC,YWHAH,CASP9,YWHAQ,NMT1,UACA,TP53,PMAIP1,AKT1,TP53BP2,CDKN2A,APIP,BCL2L11,CASP3,YWHAZ,CASP7,YWHAB,STAT3,AVEN,YWHAG,BCL2L1,BCL2,CYCS,SFN,DIABLO,TFDP1,PPP3R1,DYNLL2
REACTOME_INHIBITION_OF_REPLICATION_INITIATION_OF_DAMAGED_DNA_BY_RB1_E2F1	POLA2,E2F1,POLA1,PPP2CB,PPP2R1A,PPP2CA,TFDP2,PPP2R1B,RB1,PRIM2,PPP2R3B,PRIM1,TFDP1
REACTOME_PI3K_EVENTS_IN_ERBB4_SIGNALING	HBEGF,PIK3CA,EREG,PIK3R1,NRG1,NRG2,NRG4,BTC,ERBB4,NRG3
REACTOME_SIGNALING_BY_NOTCH	PLXND1,CREBBP,PSMB1,PSMC4,MAMLD1,TACC3,CNTN1,FLT4,PSMA4,HDAC9,CUL1,HDAC7,ST3GAL6,TLE2,YBX1,HDAC4,SEL1L,NOTCH3,ATP2A3,SIRT6,TNRC6C,ITCH,PSEN1,B4GALT1,TMED2,PSMC5,TNRC6A,DTX2,PSME1,AGO1,HDAC6,PSMD5,PSMD8,MFNG,TNRC6B,RBX1,EP300,HDAC10,GZMB,PSMC6,PSMA3,SNW1,HIF1A,PSMC1,PSMB5,PSMA6,PSME2,PSMA7,POFUT1,JAG1,E2F1,MIB1,PSMD10,TBL1X,PSMD7,FCER2,H2AZ2,LFNG,PSMA2,TLE4,ACTA2,NEURL1,PSMD3,PSMD11,KAT2A,HDAC5,FB…
REACTOME_SIGNALLING_TO_RAS	RALA,MAPK14,MAPKAPK3,SOS1,SHC2,KRAS,NGF,RALB,SHC3,MAPK13,RALGDS,SHC1,MAPKAPK2,HRAS,GRB2,MAPK11,MAPK12,SRC,NTRK1,NRAS
REACTOME_SIGNALING_BY_TGF_BETA_RECEPTOR_COMPLEX	WWTR1,STRAP,NEDD4L,RHOA,PRKCZ,UBE2D1,RBL1,CCNT2,XPO1,PPP1R15A,FKBP1A,CCNK,BAMBI,SNW1,PPM1A,SMAD7,ATP1B4,PARD6A,STUB1,ARHGEF18,TGFB1,SERPINE1,TGFBR1,MTMR4,SMURF2,UBE2D3,CBL,CCNC,TFDP2,HDAC1,UCHL5,TGIF2,PMEPA1,USP9X,CCNT1,NEDD8,UBE2M,CDK8,E2F5,MEN1,USP15,SKIL,CDK9,MYC,FURIN,NCOR1,SMAD4,CGN,PARP1,RPS27A,CDKN2B,PARD3,UBC,ZFYVE9,RNF111,SKI,F11R,TGFBR2,SMAD3,UBB,JUNB,PPP1CA,SMAD2,TGIF1,SP1,PPP1CC,NCOR2…
REACTOME_SIGNALING_BY_WNT	WNT16,HECW1,DVL2,CREBBP,AP2B1,PSMB1,PSMC4,CCDC88C,ZRANB1,RUNX3,CUL3,PSMA4,AP2S1,CUL1,WNT8A,TLE2,PPP2R5A,RHOA,PSME4,PPP2R5B,VPS35,GNB5,LRP6,CSNK2A2,CAMK2A,WNT8B,PPP2R5C,GNB1,TNRC6C,TCF7,GSK3B,XPO1,WNT11,NLK,PSMC5,GNAO1,TNRC6A,PSME1,AGO1,PSMD5,ITPR3,PSMD8,CBY1,TNRC6B,RBX1,EP300,PSMC6,PSMA3,DAAM1,PSMC1,PSMB5,CHD8,PSMA6,PSME2,PSMA7,CSNK2A1,RSPO4,PSMD10,XIAP,PORCN,PARD6A,PSMD7,AXIN1,FZD3,SFRP1,DKK4,PP…
REACTOME_PI3K_EVENTS_IN_ERBB2_SIGNALING	ERBB3,GAB1,HBEGF,PIK3CA,EREG,EGF,ERBB2,PIK3R1,EGFR,NRG1,NRG2,NRG4,BTC,GRB2,ERBB4,NRG3
REACTOME_PI3K_AKT_ACTIVATION	PIK3CB,RHOA,PIK3R2,PIK3CA,NGF,PIK3R1,IRS1,IRS2,NTRK1
REACTOME_NEGATIVE_REGULATION_OF_THE_PI3K_AKT_NETWORK	FYN,HGF,GAB2,PHLPP2,KITLG,PIK3CB,ERBB3,PPP2R5A,FGFR2,FGFR3,PPP2R5B,FGF10,FGF22,FGF4,FGFR1,PPP2R5C,FGF20,PHLPP1,FLT3LG,ESR1,MAPK1,PDGFB,TRIB3,FGF9,MAPK3,PPP2CB,AKT2,PPP2R1A,PIK3R2,MET,PIP5K1B,FGF8,AREG,GAB1,FGF6,PPP2R5D,HBEGF,PPP2CA,FGF1,PDGFRB,CD86,IL1RL1,STRN,AKT3,PIK3R3,FGF23,CD80,PIK3CA,FLT3,EREG,RAC2,KL,PDGFRA,KLB,RAC1,IL33,IER3,PPP2R1B,FGF5,FGF2,EGF,ESR2,FGF7,ERBB2,VAV1,AKT1,PIP5K1A,PIK3R1,E…
REACTOME_DOWNREGULATION_OF_TGF_BETA_RECEPTOR_SIGNALING	STRAP,NEDD4L,XPO1,PPP1R15A,BAMBI,SMAD7,STUB1,TGFB1,TGFBR1,MTMR4,SMURF2,UCHL5,PMEPA1,USP15,RPS27A,UBC,ZFYVE9,TGFBR2,SMAD3,UBB,PPP1CA,SMAD2,PPP1CC,SMURF1,PPP1CB,UBA52
REACTOME_TGF_BETA_RECEPTOR_SIGNALING_ACTIVATES_SMADS	STRAP,NEDD4L,XPO1,PPP1R15A,FKBP1A,BAMBI,SMAD7,STUB1,TGFB1,TGFBR1,MTMR4,SMURF2,CBL,UCHL5,PMEPA1,NEDD8,UBE2M,USP15,FURIN,SMAD4,RPS27A,UBC,ZFYVE9,TGFBR2,SMAD3,UBB,PPP1CA,SMAD2,PPP1CC,SMURF1,PPP1CB,UBA52
REACTOME_TGF_BETA_RECEPTOR_SIGNALING_IN_EMT_EPITHELIAL_TO_MESENCHYMAL_TRANSITION	RHOA,PRKCZ,FKBP1A,PARD6A,ARHGEF18,TGFB1,TGFBR1,CGN,RPS27A,PARD3,UBC,F11R,TGFBR2,UBB,SMURF1,UBA52
REACTOME_G2_M_DNA_DAMAGE_CHECKPOINT	BRCA1,MRE11,RFC2,TP53BP1,UIMC1,RBBP8,NBN,PIAS4,BABAM1,RPA3,YWHAE,NSD2,RFC5,RNF8,RAD1,RAD50,SUMO1,RPA2,H2BC11,YWHAH,HERC2,RPA1,RFC3,CCNB1,YWHAQ,HUS1,BRIP1,MDC1,DNA2,BARD1,TP53,H2BC1,ATM,CHEK1,RAD9B,RAD17,BABAM2,H2BC5,CDC25C,H4C8,ABRAXAS1,TOPBP1,RFC4,RNF168,ATRIP,YWHAZ,WRN,WEE1,YWHAB,H3-4,UBE2V2,YWHAG,CDK1,RHNO1,RAD9A,KAT5,EXO1,ATR,RMI2,SFN,TOP3A,UBE2N,RMI1,H2BC4,CHEK2,H2BC21,H2BC13,BRCC3,H2AX,H2BU…
REACTOME_DNA_REPAIR	RAD52,POLR2J,LIG3,REV3L,BAZ1B,SPRTN,PPP5C,BRCA1,ERCC1,MNAT1,MRE11,AQR,PIAS1,RFC1,PNKP,TDP1,POLR2B,ERCC8,RFC2,RAD51,POLQ,POLD1,RNF4,EYA2,NTHL1,KDM4A,TP53BP1,UFD1,POLB,RAD18,XRCC1,TIPIN,ACTB,MLH1,UNG,XAB2,UBE2T,SIRT6,POLD3,XRCC5,RIF1,PALB2,PPIE,UIMC1,ALKBH5,TINF2,CLSPN,MSH2,ABL1,POLR2E,POLR2F,ASCC2,RBX1,EP300,POLE2,YY1,APEX1,ACTR5,POLI,RBBP8,ACD,POLR2C,MPG,USP10,UBE2I,EYA1,NBN,ERCC2,PIAS4,POLR2I,BA…

## Sheet: Sheet3
Table S1. Genes mapped to core cancer pathways.
BIOCARTA_MAPK_PATHWAY	MAPK3,MAP3K3,HRAS,MAPK11,NFKBIA,MAP4K1,RPS6KA4,MAP2K5,MAPK10,MAP4K5,TGFB2,MAPK8,MAP2K1,MAP3K2,RPS6KA1,MAPK7,RAF1,MAPK13,ELK1,MAP3K5,MAP3K6,CHUK,MYC,MAPKAPK3,MAX,DAXX,MKNK1,MAP3K4,MAP3K14,MAPK6,RAC1,MAPKAPK5,MAP4K4,MAPK1,MAP3K8,MAPK12,MAPK4,SHC1,PAK1,GRB2,RPS6KA3,MAP3K9,TRADD,RPS6KB1,MAP2K6,MAP2K2,MAP3K10,MAPK9,MAPK14,TGFBR1,MAP3K11,RELA,RPS6KA5,MAP2K3,MAP2K4,MKNK2,CREB1,PAK2,RIPK1,TRAF2,MAP2K7,MA…
BIOCARTA_P53_PATHWAY	CDK2,GADD45A,CDK4,PCNA,BCL2,CCNE1,ATM,CDKN1A,RB1,TP53,MDM2,CCND1,APAF1,BAX,TIMP3,E2F1
BIOCARTA_P53HYPOXIA_PATHWAY	NFKBIB,HIC1,GADD45A,MAPK8,TAF1,HSPA1A,ATM,CDKN1A,NQO1,TP53,FHL2,IGFBP3,RPA1,MDM2,ABCB1,DNAJB1,EP300,HSP90AA1,AKT1,HIF1A,BAX
BIOCARTA_PTEN_PATHWAY	MAPK3,FASLG,PIK3R1,FOXO3,CDKN1B,PDK2,MAPK1,SHC1,GRB2,PDPK1,BCAR1,EGFR,PTEN,AKT1,PIK3CA,ITGB1,ILK,SOS1
BIOCARTA_RAS_PATHWAY	MAPK3,RALA,PIK3CG,HRAS,RALGDS,PIK3R1,MAP2K1,RAF1,ELK1,CHUK,RHOA,CASP9,BAD,PLD1,RAC1,CDC42,RELA,AKT1,RALBP1,PIK3CA,FOXO4,NFKB1
BIOCARTA_TGFB_PATHWAY	MAPK3,SMAD2,SMAD4,TGFBR2,TGFB2,MAP2K1,APC,CREBBP,CDH1,SMAD7,TGFBR1,TAB1,EP300,ZFYVE9,SKIL,TGFB3,MAP3K7,TGFB1,SMAD3
BIOCARTA_WNT_PATHWAY	SMAD4,HDAC1,FZD1,PPP2CA,FRAT1,APC,TLE1,MYC,CTBP1,NLK,WNT1,WIF1,GSK3B,CREBBP,CTNNB1,TAB1,CCND1,AXIN1,MAP3K7,BTRC,CSNK2A1,HNF1A,PPARD,DVL1
KEGG_AMINOACYL_TRNA_BIOSYNTHESIS	CARS2,DARS2,RARS1,SARS1,VARS2,YARS2,WARS1,AARS1,FARSA,HARS1,SARS2,RARS2,NARS1,LARS2,FARSB,AARS2,YARS1,NARS2,GARS1,IARS2,KARS1,WARS2,TARS3,LARS1,VARS1,PARS2,MARS2,CARS1,IARS1,TARS2,SEPSECS,MTFMT,TARS1,DARS1,HARS2,PSTK,QARS1,EARS2,EPRS1,FARS2,MARS1
KEGG_APOPTOSIS	CASP10,CASP9,CASP8,CASP7,CHUK,PRKAR2B,TNF,TNFSF10,BIRC3,XIAP,PPP3R2,PPP3CC,PPP3R1,MYD88,FADD,CFLAR,RIPK1,BAD,IRAK4,BID,BAX,IKBKB,CASP6,IL1A,AKT1,CASP3,AKT2,TNFRSF1A,AKT3,CHP2,ATM,ENDOG,NFKB1,NFKBIA,CAPN2,PIK3R5,IKBKG,CAPN1,IL3RA,IL3,RELA,ENDOD1,APAF1,PRKX,CSF2RB,TNFRSF10A,TRAF2,TNFRSF10D,NGF,TNFRSF10B,TNFRSF10C,MAP3K14,IL1RAP,IL1B,IRAK2,IL1R1,IRAK1,TRADD,PIK3R3,BCL2,BCL2L1,BIRC2,IRAK3,PRKACA,PRKA…
KEGG_MAPK_SIGNALING_PATHWAY	JUN,MEF2C,ELK4,ELK1,JUND,GADD45B,MAP3K20,STMN1,RRAS2,MAP3K5,MAP3K1,MAP3K3,MAP3K4,MAP3K7,MAP3K8,AKT1,AKT2,ARRB2,CD14,ARRB1,NRAS,DUSP16,CHP2,RASGRP3,NFKB2,NFKB1,MYC,NFATC4,MAPK14,FLNC,FLNA,KRAS,FLNB,PRKX,TRAF6,TGFB2,DUSP1,DUSP2,TGFB1,TRAF2,BDNF,TAB2,ECSIT,TGFBR2,DUSP7,TGFBR1,DUSP5,DUSP6,DUSP3,TGFB3,PLA2G4E,DUSP4,CACNG5,CACNG4,NF1,PLA2G12A,NFATC2,RASGRP4,MAP3K2,MAX,DUSP10,FGF9,FGF8,FGF7,FGF6,FGF5,FG…
KEGG_CELL_CYCLE	CDC16,CDC7,CDC45,GADD45B,DBF4,ANAPC1,CREBBP,MDM2,ABL1,SMC1B,SKP1P2,GADD45G,ATM,ATR,ANAPC7,RBL2,ANAPC5,RBL1,MYC,CDC14B,SMC1A,CDC14A,SKP1,TGFB2,TGFB1,GADD45A,STAG1,PLK1,RBX1,STAG2,TGFB3,MCM4,ORC6,CCND1,MAD1L1,MCM3,MCM6,MCM5,YWHAB,CCNA2,MCM7,BUB1,CHEK1,WEE2,MCM2,PTTG1,CDC27,CDC25B,CDC25C,CDC25A,CDC6,CDC20,BUB3,YWHAZ,CCND2,YWHAH,CCNB1,YWHAG,YWHAE,CCNE1,ORC3,CCND3,PTTG2,SFN,E2F1,TFDP1,ZBTB17,CDK1,ESPL…
KEGG_P53_SIGNALING_PATHWAY	CASP9,CASP8,SFN,TSC2,IGF1,CDK1,GADD45B,RCHY1,ZMAT3,IGFBP3,RRM2B,ADGRB1,TP73,SERPINB5,RPRM,PPM1D,BID,MDM4,BAX,MDM2,TP53AIP1,CASP3,TP53I3,PMAIP1,PIDD1,COP1,PERP,GADD45G,EI24,SESN2,ATM,ATR,SESN3,CHEK2,APAF1,CDKN2A,RRM2,CDKN1A,BBC3,GADD45A,TNFRSF10B,DDB2,GTSE1,SIAH1,CCND1,CD82,PTEN,CDK2,CHEK1,SESN1,CDK4,SERPINE1,TP53,CCNE2,FAS,CDK6,CYCS,STEAP3,CCNB2,CCND2,SHISA5,CCNB1,CCNG1,CCNE1,CCNB3,THBS1,CCNG2,CC…
KEGG_WNT_SIGNALING_PATHWAY	JUN,LRP5,LRP6,PPP3R2,SFRP2,SFRP1,PPP3CC,VANGL1,PPP3R1,FZD1,FZD4,APC2,FZD6,FZD7,SENP2,FZD8,LEF1,CREBBP,FZD9,PRICKLE1,CTBP2,ROCK1,CTBP1,WNT9B,WNT9A,CTNNBIP1,DAAM2,TBL1XR1,MMP7,CER1,MAP3K7,VANGL2,WNT2B,WNT11,WNT10B,DKK2,SKP1P2,CHP2,AXIN1,AXIN2,DKK4,NFAT5,MYC,SOX17,CSNK2A1,CSNK2A2,NFATC4,CSNK1A1,NFATC3,CSNK1E,BTRC,PRKX,SKP1,FBXW11,RBX1,CSNK2B,SIAH1,TBL1Y,WNT5B,CCND1,CAMK2A,NLK,CAMK2B,CAMK2D,CAMK2G,PR…
KEGG_NOTCH_SIGNALING_PATHWAY	HES5,DTX3,NOTCH4,DTX3L,NOTCH3,NOTCH2,EP300,HES1,NOTCH1,NUMB,PSEN2,PSEN1,PTCRA,SNW1,APH1A,KAT2A,ADAM17,RFNG,RBPJ,DTX1,CREBBP,DTX2,MAML1,CTBP2,NCOR2,CTBP1,DVL3,JAG2,DVL2,NUMBL,MAML2,KAT2B,DLL4,PSENEN,DLL3,DVL1,CIR1,DLL1,LFNG,JAG1,MAML3,HDAC1,HDAC2,NCSTN,DTX4,MFNG,RBPJL
KEGG_HEDGEHOG_SIGNALING_PATHWAY	CSNK1A1L,HHIP,PTCH2,GAS1,WNT3A,ZIC2,WNT9B,WNT9A,LRP2,CSNK1G1,WNT2B,WNT11,WNT10B,IHH,SMO,WNT10A,WNT4,CSNK1G3,SHH,WNT1,CSNK1D,RAB23,CSNK1A1,CSNK1G2,CSNK1E,BMP8A,GSK3B,WNT7A,BTRC,WNT7B,WNT8A,WNT8B,WNT2,WNT3,PRKX,WNT5A,WNT6,FBXW11,STK36,WNT5B,GLI1,DHH,PRKACA,PRKACB,SUFU,BMP4,PRKACG,BMP2,GLI2,BMP7,GLI3,PTCH1,BMP8B,WNT16,BMP5,BMP6
KEGG_TGF_BETA_SIGNALING_PATHWAY	TFDP1,NOG,TNF,GDF7,INHBB,INHBC,COMP,INHBA,THBS4,RHOA,CREBBP,ROCK1,ID1,ID2,RPS6KB1,RPS6KB2,CUL1,SKP1P2,ID4,SMAD3,MAPK3,RBL2,SMAD4,RBL1,NODAL,SMAD1,MYC,SMAD2,MAPK1,SMURF2,SMURF1,EP300,BMP8A,GDF5,SKP1,CHRD,TGFB2,TGFB1,IFNG,CDKN2B,PPP2CB,PPP2CA,PPP2R1A,ID3,SMAD5,RBX1,FST,PITX2,PPP2R1B,TGFBR2,AMHR2,LTBP1,LEFTY1,AMH,TGFBR1,SMAD9,LEFTY2,SMAD7,ROCK2,TGFB3,SMAD6,BMPR2,GDF6,BMPR1A,BMPR1B,ACVRL1,ACVR2B,ACVR…
KEGG_JAK_STAT_SIGNALING_PATHWAY	STAT3,STAT4,STAT1,STAT2,PIAS3,TYK2,IL21R,CREBBP,SOCS5,IL23A,CTF1,STAM,SPRY4,IL22,JAK1,AKT1,AKT2,JAK3,JAK2,AKT3,STAT5B,STAT5A,TPO,STAT6,MYC,IL24,SPRED1,PIK3R5,CSF2,IL13RA2,PIAS1,IL13RA1,CNTF,PRLR,CNTFR,PRL,SOCS1,IFNE,CSF2RB,CSF2RA,IL23R,CSF3,SOCS3,CCND1,IL22RA2,CSH1,BCL2L1,CSF3R,PIAS4,CBLC,CLCF1,OSMR,IL20,CCND2,CCND3,SOS2,EPO,PTPN11,IL9R,MPL,SPRED2,IFNA5,IFNA4,IFNA2,IFNLR1,SOCS2,IFNA1,CISH,PTPN6,I…
PID_NOTCH_PATHWAY	NCOR1,NOTCH1,DTX1,FURIN,SSPOP,DLL1,DNM1,PTCRA,RAB11A,NEURL1,CTBP1,FBXW7,NUMB,CBL,MFAP2,MYCBP,DLL4,MAML1,SPEN,MYC,SKP2,CNTN6,NOTCH2,PSEN1,MAML2,YY1,GATA3,ENO1,ITCH,IL4,APH1B,LNX1,NCOR2,RBPJ,CDKN1A,JAG2,ADAM12,DLK1,EPS15,DNER,SKP1,NOTCH3,RBBP8,NOTCH4,JAG1,APH1A,DLL3,PSENEN,MFAP5,NCSTN,CCND1,EP300,HDAC1,MARK2,MIB1,ADAM10,CUL1,CNTN1,KDM1A
PID_WNT_NONCANONICAL_PATHWAY	YES1,PRKCZ,MAP3K7,TAB2,FLNA,CSNK1A1,CDC42,DAAM1,FZD7,WNT5A,ROR2,NFATC2,SETDB1,NLK,ROCK1,RAC1,ARRB2,FZD5,MAPK8,CHD7,MAPK9,PPARG,CAMK2A,DVL1,RHOA,FZD6,CTHRC1,DVL2,DVL3,FZD2,TAB1,MAPK10
PID_WNT_SIGNALING_PATHWAY	DKK1,WNT3A,FZD9,WNT2,WNT7A,IGFBP4,WNT1,FZD8,FZD1,KREMEN2,LRP6,KREMEN1,FZD2,LRP5,FZD6,RSPO1,WNT7B,FZD4,CTHRC1,WNT5A,RYK,FZD5,ATP6AP2,WNT3,ROR2,WIF1,FZD10,FZD7
PID_WNT_CANONICAL_PATHWAY	LRP6,GSK3A,AXIN1,CUL3,WNT3A,DVL3,GSK3B,FZD5,PPP2R5A,CSNK1G1,DVL1,PI4K2A,CTNNB1,DVL2,APC,NKD2,PIP5K1B,RANBP3,KLHL12,CAV1
REACTOME_INTRINSIC_PATHWAY_FOR_APOPTOSIS	BAD,BID,BAK1,CASP8,TP63,TP73,BAX,PPP1R13B,DYNLL1,MAPK1,GZMB,E2F1,XIAP,MAPK3,BMF,GSDMD,AKT2,BBC3,CARD8,GSDME,MAPK8,SEPTIN4,C1QBP,YWHAE,TFDP2,AKT3,APAF1,PPP3CC,YWHAH,CASP9,YWHAQ,NMT1,UACA,TP53,PMAIP1,AKT1,TP53BP2,CDKN2A,APIP,BCL2L11,CASP3,YWHAZ,CASP7,YWHAB,STAT3,AVEN,YWHAG,BCL2L1,BCL2,CYCS,SFN,DIABLO,TFDP1,PPP3R1,DYNLL2
REACTOME_INHIBITION_OF_REPLICATION_INITIATION_OF_DAMAGED_DNA_BY_RB1_E2F1	POLA2,E2F1,POLA1,PPP2CB,PPP2R1A,PPP2CA,TFDP2,PPP2R1B,RB1,PRIM2,PPP2R3B,PRIM1,TFDP1
REACTOME_PI3K_EVENTS_IN_ERBB4_SIGNALING	HBEGF,PIK3CA,EREG,PIK3R1,NRG1,NRG2,NRG4,BTC,ERBB4,NRG3
REACTOME_SIGNALING_BY_NOTCH	PLXND1,CREBBP,PSMB1,PSMC4,MAMLD1,TACC3,CNTN1,FLT4,PSMA4,HDAC9,CUL1,HDAC7,ST3GAL6,TLE2,YBX1,HDAC4,SEL1L,NOTCH3,ATP2A3,SIRT6,TNRC6C,ITCH,PSEN1,B4GALT1,TMED2,PSMC5,TNRC6A,DTX2,PSME1,AGO1,HDAC6,PSMD5,PSMD8,MFNG,TNRC6B,RBX1,EP300,HDAC10,GZMB,PSMC6,PSMA3,SNW1,HIF1A,PSMC1,PSMB5,PSMA6,PSME2,PSMA7,POFUT1,JAG1,E2F1,MIB1,PSMD10,TBL1X,PSMD7,FCER2,H2AZ2,LFNG,PSMA2,TLE4,ACTA2,NEURL1,PSMD3,PSMD11,KAT2A,HDAC5,FB…
REACTOME_SIGNALLING_TO_RAS	RALA,MAPK14,MAPKAPK3,SOS1,SHC2,KRAS,NGF,RALB,SHC3,MAPK13,RALGDS,SHC1,MAPKAPK2,HRAS,GRB2,MAPK11,MAPK12,SRC,NTRK1,NRAS
REACTOME_SIGNALING_BY_TGF_BETA_RECEPTOR_COMPLEX	WWTR1,STRAP,NEDD4L,RHOA,PRKCZ,UBE2D1,RBL1,CCNT2,XPO1,PPP1R15A,FKBP1A,CCNK,BAMBI,SNW1,PPM1A,SMAD7,ATP1B4,PARD6A,STUB1,ARHGEF18,TGFB1,SERPINE1,TGFBR1,MTMR4,SMURF2,UBE2D3,CBL,CCNC,TFDP2,HDAC1,UCHL5,TGIF2,PMEPA1,USP9X,CCNT1,NEDD8,UBE2M,CDK8,E2F5,MEN1,USP15,SKIL,CDK9,MYC,FURIN,NCOR1,SMAD4,CGN,PARP1,RPS27A,CDKN2B,PARD3,UBC,ZFYVE9,RNF111,SKI,F11R,TGFBR2,SMAD3,UBB,JUNB,PPP1CA,SMAD2,TGIF1,SP1,PPP1CC,NCOR2…
REACTOME_SIGNALING_BY_WNT	WNT16,HECW1,DVL2,CREBBP,AP2B1,PSMB1,PSMC4,CCDC88C,ZRANB1,RUNX3,CUL3,PSMA4,AP2S1,CUL1,WNT8A,TLE2,PPP2R5A,RHOA,PSME4,PPP2R5B,VPS35,GNB5,LRP6,CSNK2A2,CAMK2A,WNT8B,PPP2R5C,GNB1,TNRC6C,TCF7,GSK3B,XPO1,WNT11,NLK,PSMC5,GNAO1,TNRC6A,PSME1,AGO1,PSMD5,ITPR3,PSMD8,CBY1,TNRC6B,RBX1,EP300,PSMC6,PSMA3,DAAM1,PSMC1,PSMB5,CHD8,PSMA6,PSME2,PSMA7,CSNK2A1,RSPO4,PSMD10,XIAP,PORCN,PARD6A,PSMD7,AXIN1,FZD3,SFRP1,DKK4,PP…
REACTOME_PI3K_EVENTS_IN_ERBB2_SIGNALING	ERBB3,GAB1,HBEGF,PIK3CA,EREG,EGF,ERBB2,PIK3R1,EGFR,NRG1,NRG2,NRG4,BTC,GRB2,ERBB4,NRG3
REACTOME_PI3K_AKT_ACTIVATION	PIK3CB,RHOA,PIK3R2,PIK3CA,NGF,PIK3R1,IRS1,IRS2,NTRK1
REACTOME_NEGATIVE_REGULATION_OF_THE_PI3K_AKT_NETWORK	FYN,HGF,GAB2,PHLPP2,KITLG,PIK3CB,ERBB3,PPP2R5A,FGFR2,FGFR3,PPP2R5B,FGF10,FGF22,FGF4,FGFR1,PPP2R5C,FGF20,PHLPP1,FLT3LG,ESR1,MAPK1,PDGFB,TRIB3,FGF9,MAPK3,PPP2CB,AKT2,PPP2R1A,PIK3R2,MET,PIP5K1B,FGF8,AREG,GAB1,FGF6,PPP2R5D,HBEGF,PPP2CA,FGF1,PDGFRB,CD86,IL1RL1,STRN,AKT3,PIK3R3,FGF23,CD80,PIK3CA,FLT3,EREG,RAC2,KL,PDGFRA,KLB,RAC1,IL33,IER3,PPP2R1B,FGF5,FGF2,EGF,ESR2,FGF7,ERBB2,VAV1,AKT1,PIP5K1A,PIK3R1,E…
REACTOME_DOWNREGULATION_OF_TGF_BETA_RECEPTOR_SIGNALING	STRAP,NEDD4L,XPO1,PPP1R15A,BAMBI,SMAD7,STUB1,TGFB1,TGFBR1,MTMR4,SMURF2,UCHL5,PMEPA1,USP15,RPS27A,UBC,ZFYVE9,TGFBR2,SMAD3,UBB,PPP1CA,SMAD2,PPP1CC,SMURF1,PPP1CB,UBA52
REACTOME_TGF_BETA_RECEPTOR_SIGNALING_ACTIVATES_SMADS	STRAP,NEDD4L,XPO1,PPP1R15A,FKBP1A,BAMBI,SMAD7,STUB1,TGFB1,TGFBR1,MTMR4,SMURF2,CBL,UCHL5,PMEPA1,NEDD8,UBE2M,USP15,FURIN,SMAD4,RPS27A,UBC,ZFYVE9,TGFBR2,SMAD3,UBB,PPP1CA,SMAD2,PPP1CC,SMURF1,PPP1CB,UBA52
REACTOME_TGF_BETA_RECEPTOR_SIGNALING_IN_EMT_EPITHELIAL_TO_MESENCHYMAL_TRANSITION	RHOA,PRKCZ,FKBP1A,PARD6A,ARHGEF18,TGFB1,TGFBR1,CGN,RPS27A,PARD3,UBC,F11R,TGFBR2,UBB,SMURF1,UBA52
REACTOME_G2_M_DNA_DAMAGE_CHECKPOINT	BRCA1,MRE11,RFC2,TP53BP1,UIMC1,RBBP8,NBN,PIAS4,BABAM1,RPA3,YWHAE,NSD2,RFC5,RNF8,RAD1,RAD50,SUMO1,RPA2,H2BC11,YWHAH,HERC2,RPA1,RFC3,CCNB1,YWHAQ,HUS1,BRIP1,MDC1,DNA2,BARD1,TP53,H2BC1,ATM,CHEK1,RAD9B,RAD17,BABAM2,H2BC5,CDC25C,H4C8,ABRAXAS1,TOPBP1,RFC4,RNF168,ATRIP,YWHAZ,WRN,WEE1,YWHAB,H3_4,UBE2V2,YWHAG,CDK1,RHNO1,RAD9A,KAT5,EXO1,ATR,RMI2,SFN,TOP3A,UBE2N,RMI1,H2BC4,CHEK2,H2BC21,H2BC13,BRCC3,H2AX,H2BU…
REACTOME_DNA_REPAIR	RAD52,POLR2J,LIG3,REV3L,BAZ1B,SPRTN,PPP5C,BRCA1,ERCC1,MNAT1,MRE11,AQR,PIAS1,RFC1,PNKP,TDP1,POLR2B,ERCC8,RFC2,RAD51,POLQ,POLD1,RNF4,EYA2,NTHL1,KDM4A,TP53BP1,UFD1,POLB,RAD18,XRCC1,TIPIN,ACTB,MLH1,UNG,XAB2,UBE2T,SIRT6,POLD3,XRCC5,RIF1,PALB2,PPIE,UIMC1,ALKBH5,TINF2,CLSPN,MSH2,ABL1,POLR2E,POLR2F,ASCC2,RBX1,EP300,POLE2,YY1,APEX1,ACTR5,POLI,RBBP8,ACD,POLR2C,MPG,USP10,UBE2I,EYA1,NBN,ERCC2,PIAS4,POLR2I,BA…
